# Supplementary material for: Identification and Characterization of a δ-Cadinol Synthase Potentially Involved in the Formation of Boreovibrins in Boreostereum vibrans of Basidiomycota
Source: PubMed Central journal article supplement (PMC5385660; doi:10.1007/s13659-016-0096-4), 2016-04-01
Supplement: 13659_2016_96_MOESM1_ESM.pdf [file 13659_2016_96_MOESM1_ESM.pdf]

## Supplementary Material

Three alternative mechanisms for the biosynthesis of cadalane sesquiterpenes as presented in the publication of P. Rabe, J. S. Dickschat, *Angew. Chem. Int. Ed.* **52**, 1810–1812 (2013)

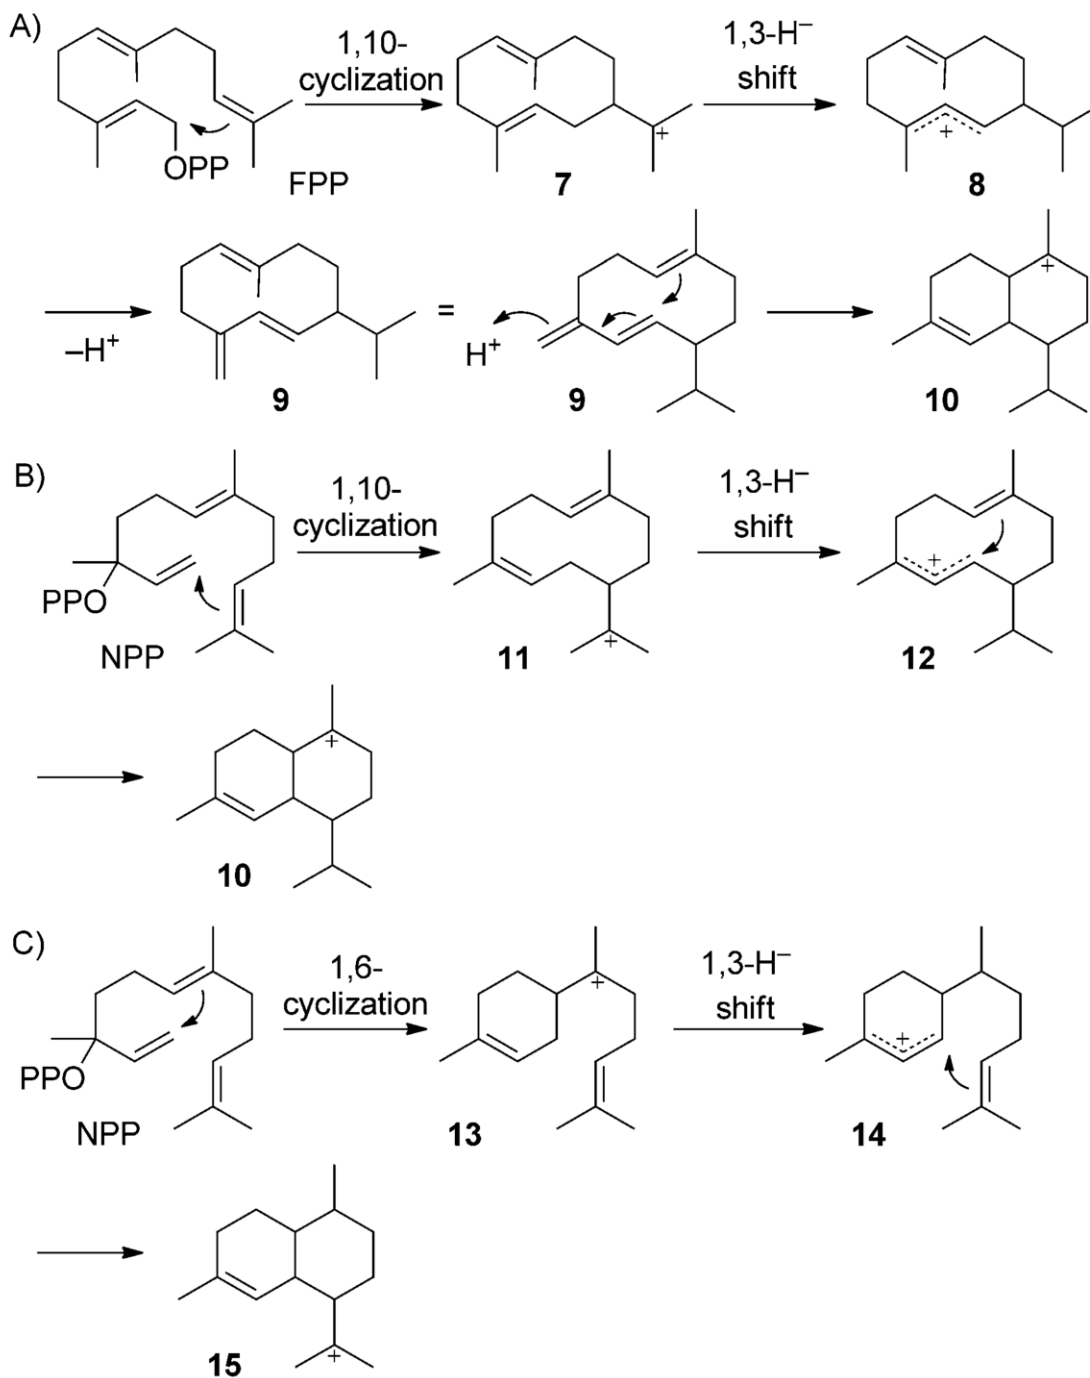

**Table S1.** Sequence identities (%) of the fungal homologs of Basidiomycota

|                                                          | <i>B. vibrans</i> | <i>C. cinereus</i> | <i>Termitomyces</i> sp.<br>J132 | <i>S. hirsutum</i> |
|----------------------------------------------------------|-------------------|--------------------|---------------------------------|--------------------|
| <i>BvCS</i> / <i>B. vibrans</i>                          | ID                | 0.492              | 0.489                           | 0.225              |
| $\alpha$ -muurolene synthase<br><i>Coprinus cinereus</i> |                   | ID                 | 0.559                           | 0.228              |
| germacradienol synthase<br><i>Termitomyces</i> sp. J132  |                   |                    | ID                              | 0.286              |
| $\delta$ -cadinene synthase<br><i>Stereum hirsutum</i>   |                   |                    |                                 | ID                 |

**Figure S1.** Expression of *BvCS* in pET32a+ / *E. coli* BL21(DE3) detected by SDS-PAGE

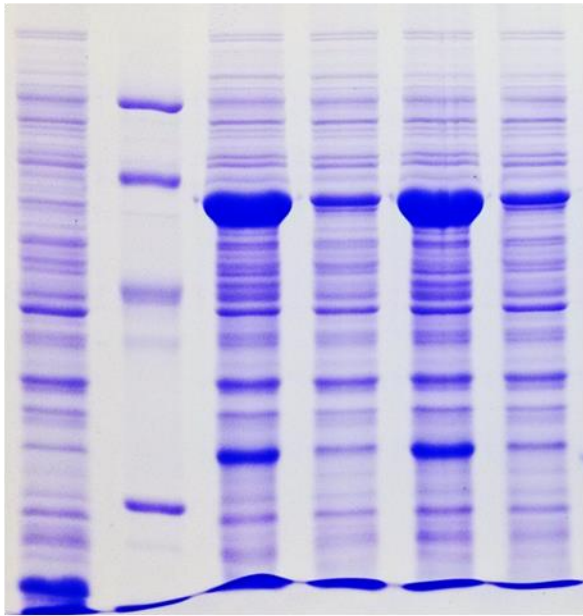

*BvCS* /pET32a+ in *E. coli* induced at 37°C for 8 h with 0.5 or 0.1 (right) mM IPTG

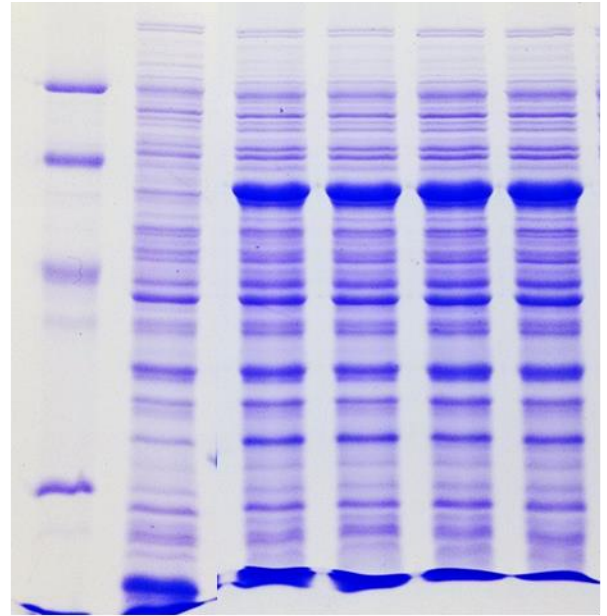

*BvCS* /pET32a+ in *E. coli* induced at 15°C for 22 h with 0.5 or 0.1 (right) mM IPTG

GC-MS analyses of **crude recombinant BvCS**, showing major product at 18.68 min and minor product at 17.10 min. Peak at 20.25 min is farnesol hydrolyzed from FPP as substrate by *E. coli* phosphatase.

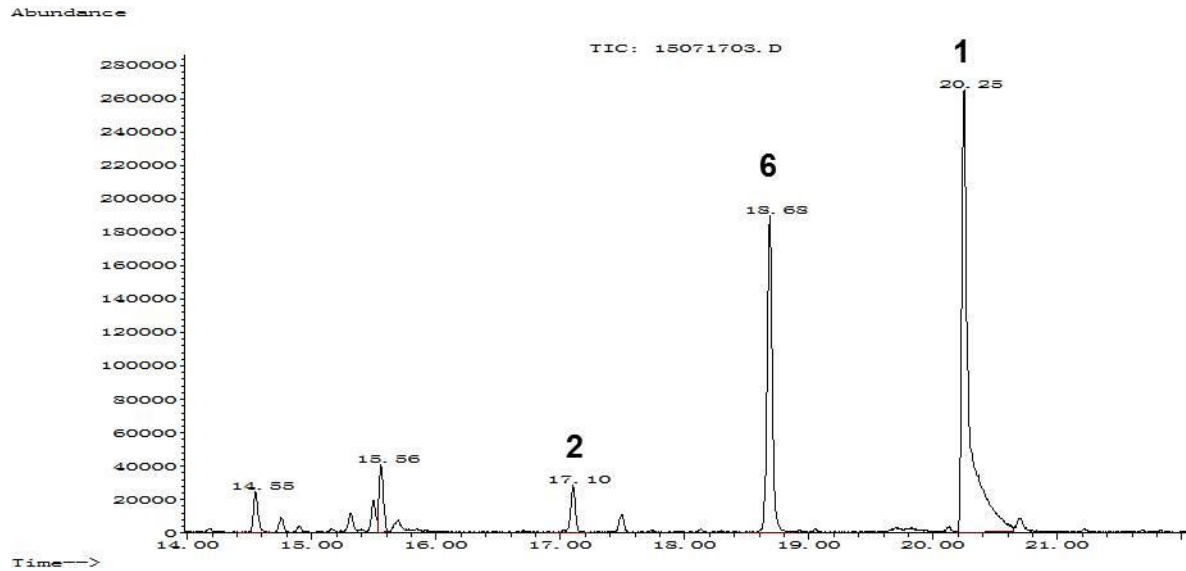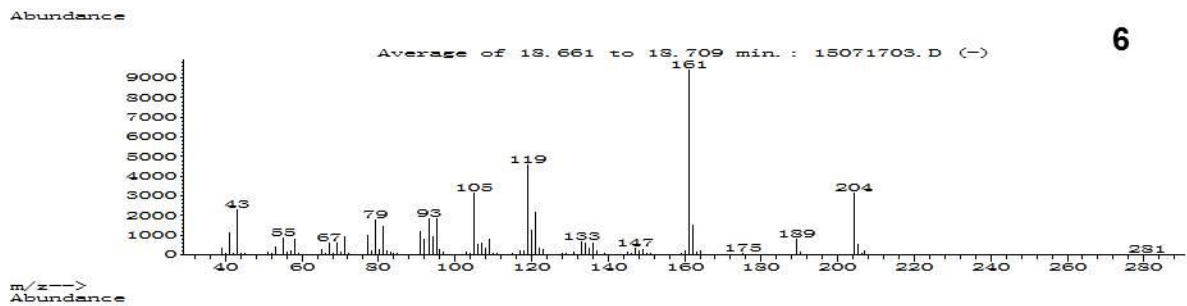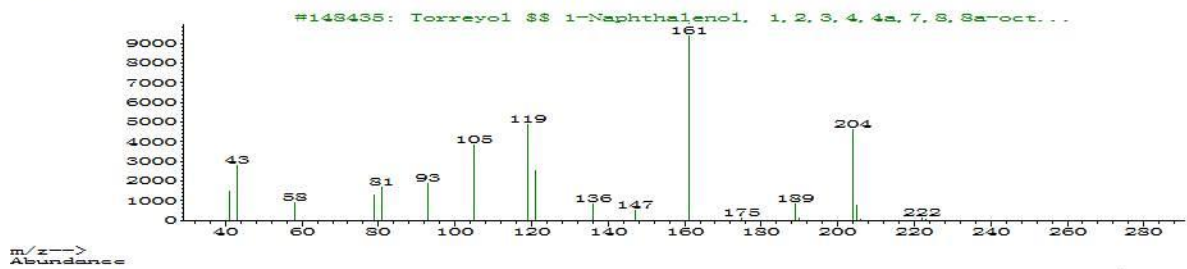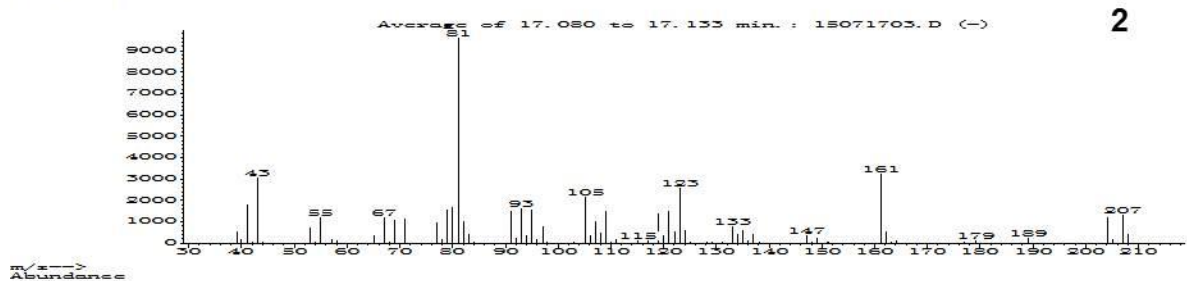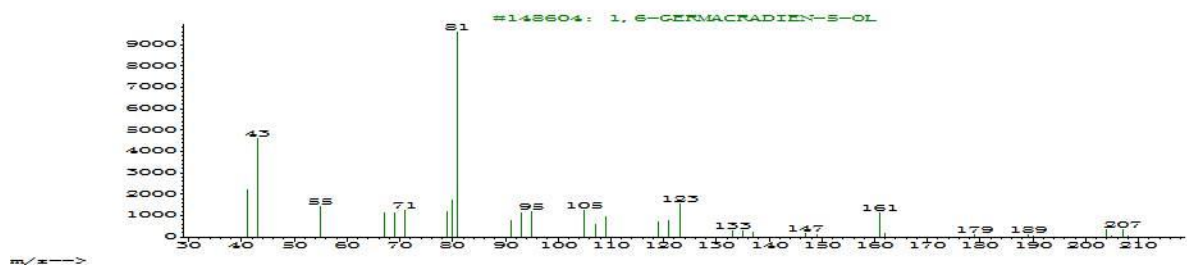

Abundance

1

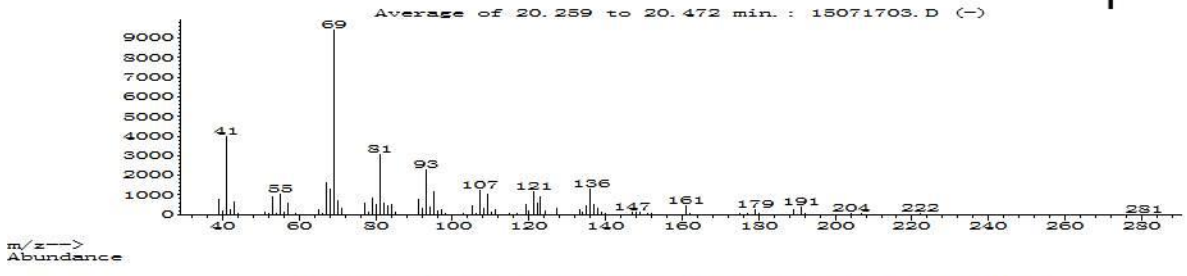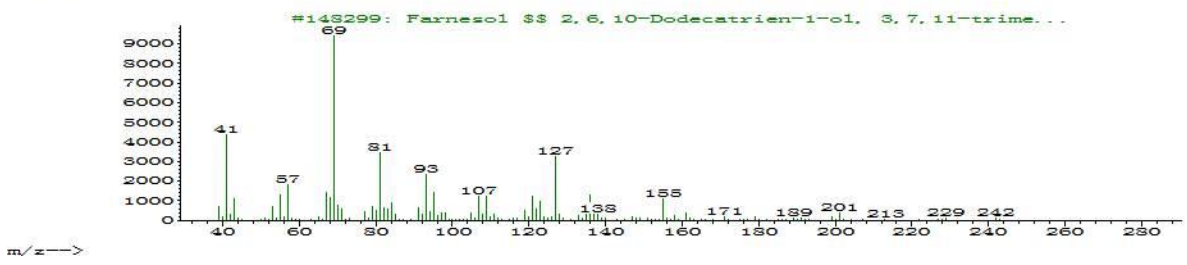

### Empty vector as control

Abundance

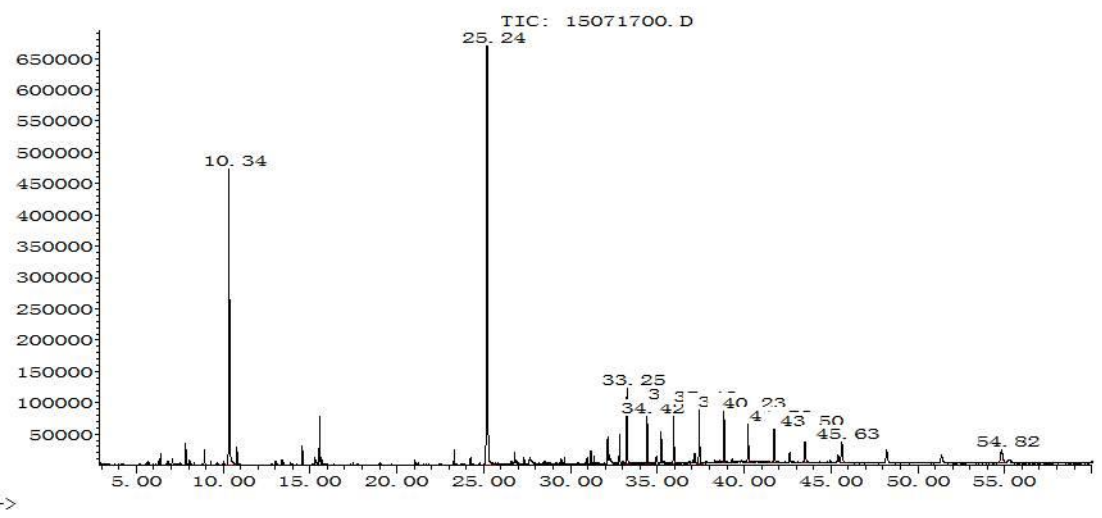

Abundance

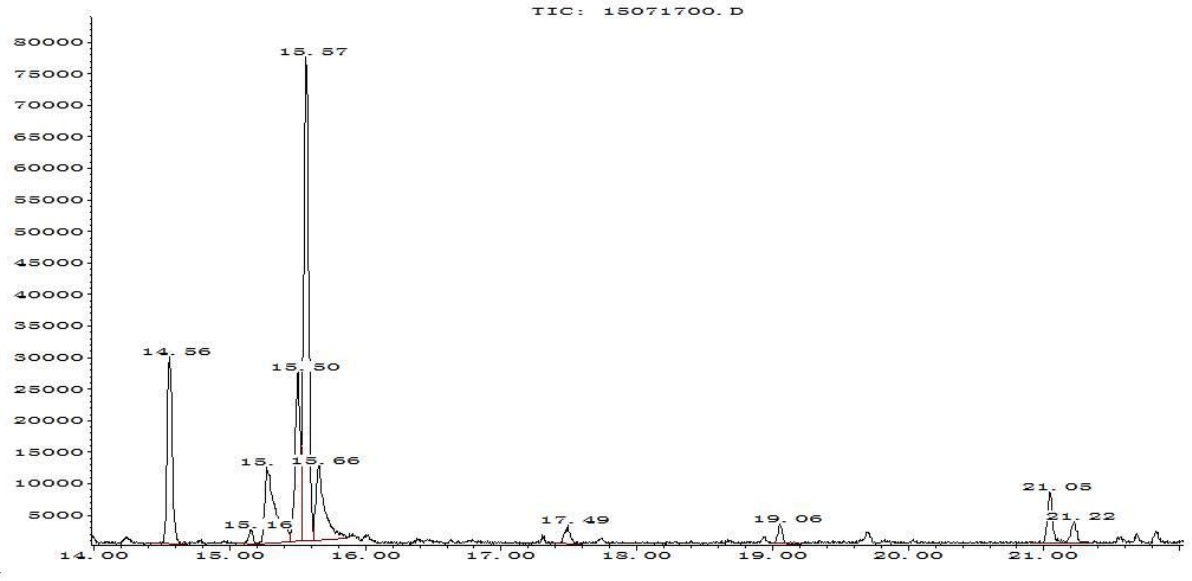

GC-MS analyses of the **purified recombinant BvCS**, showing major product at 18.68 min and minor products at 17.10 min, 15.32 min and 14.76min, compared to the heat-denatured BvCS as control.

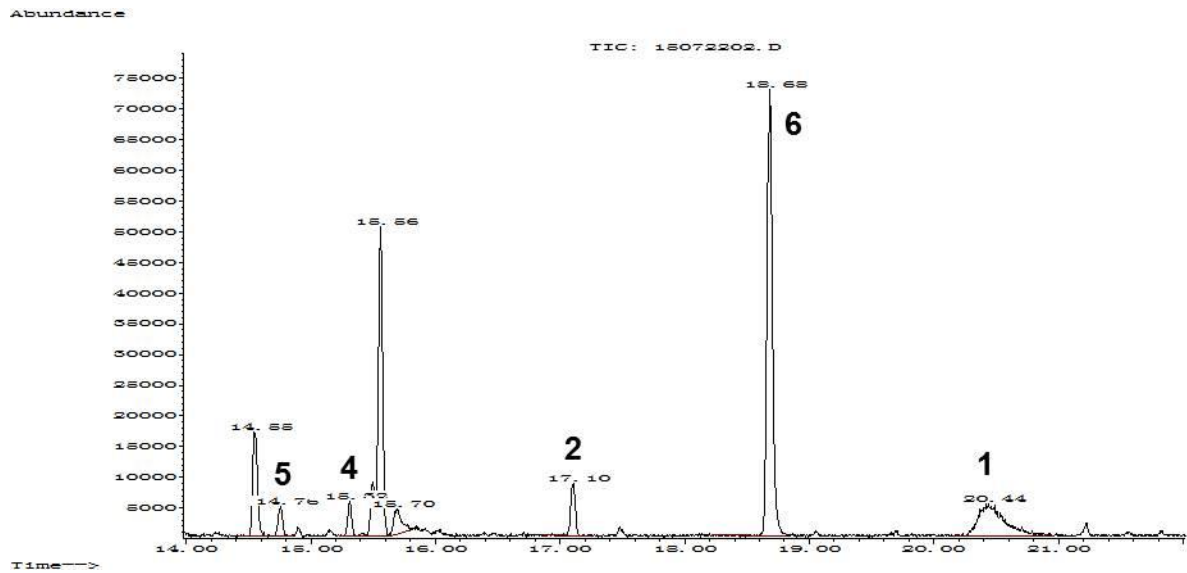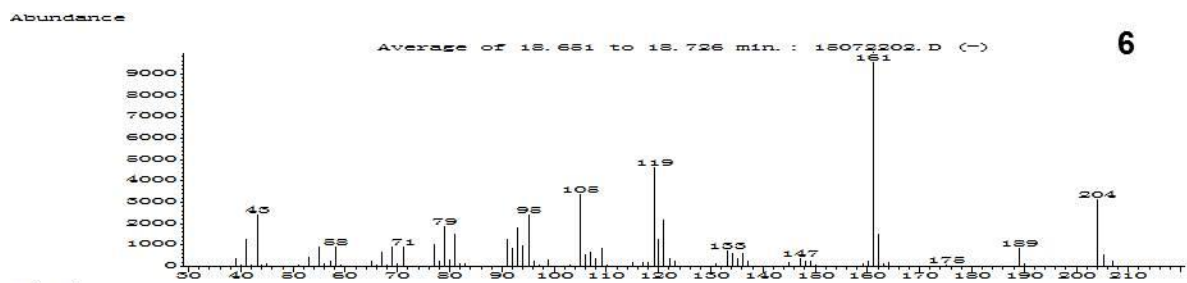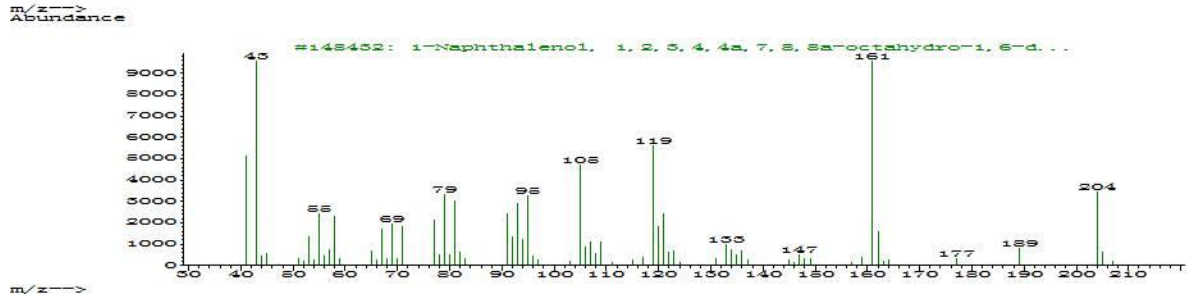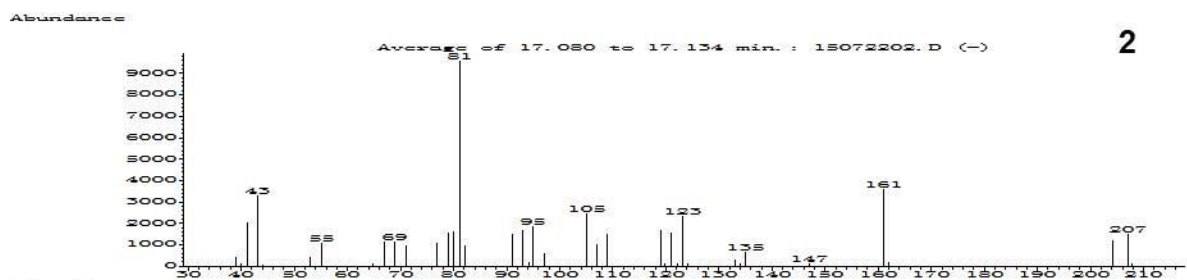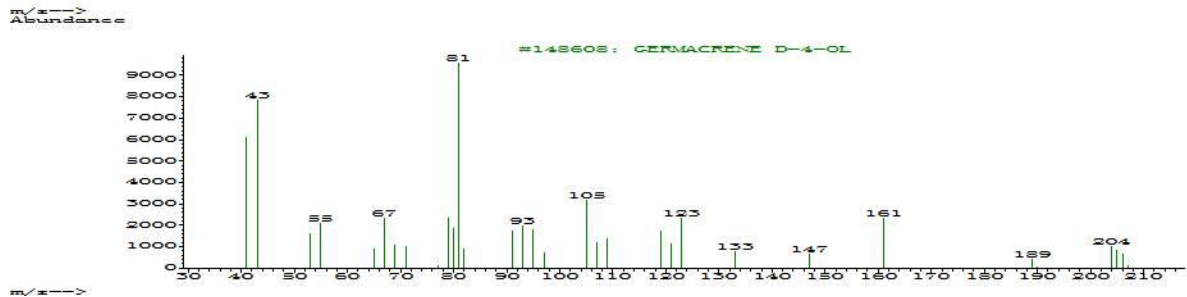

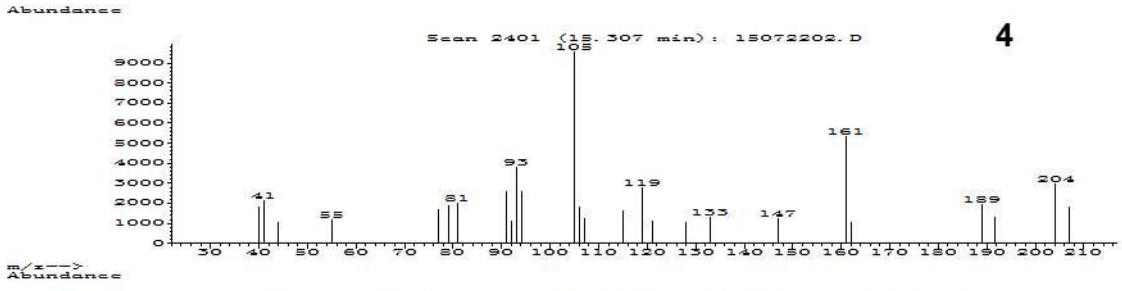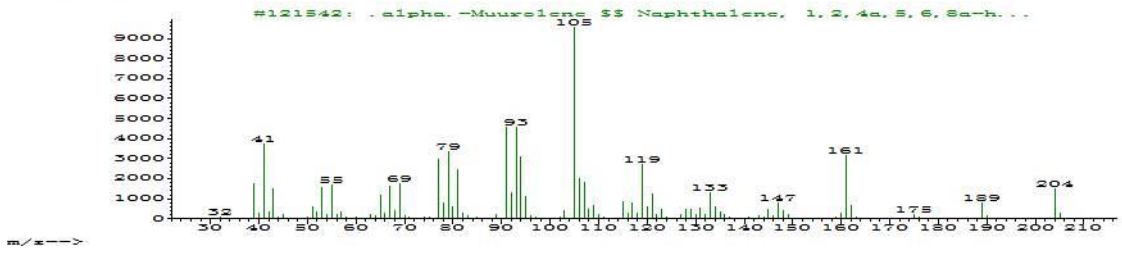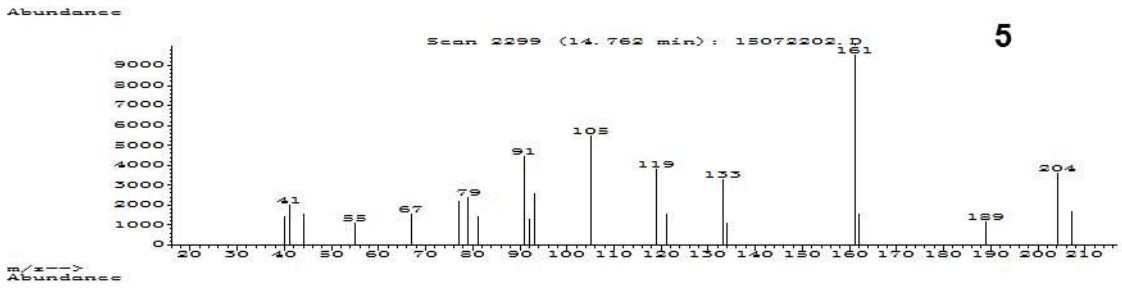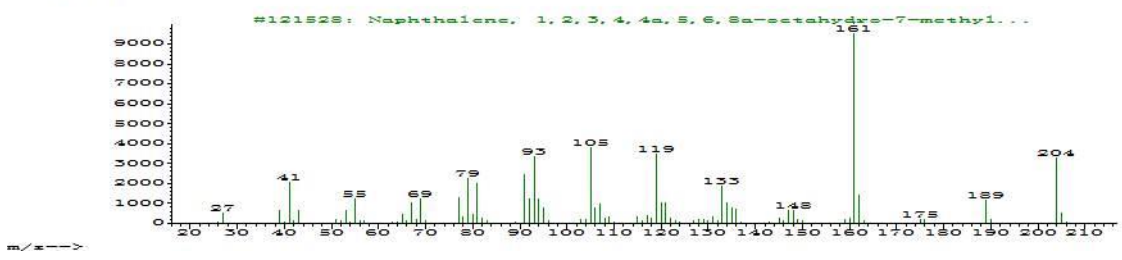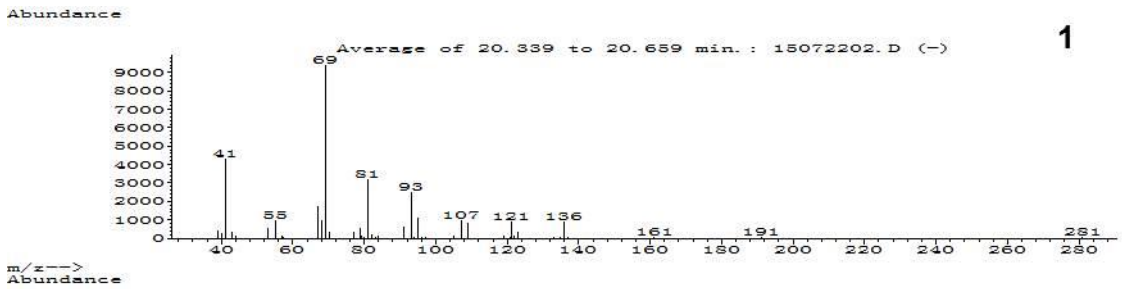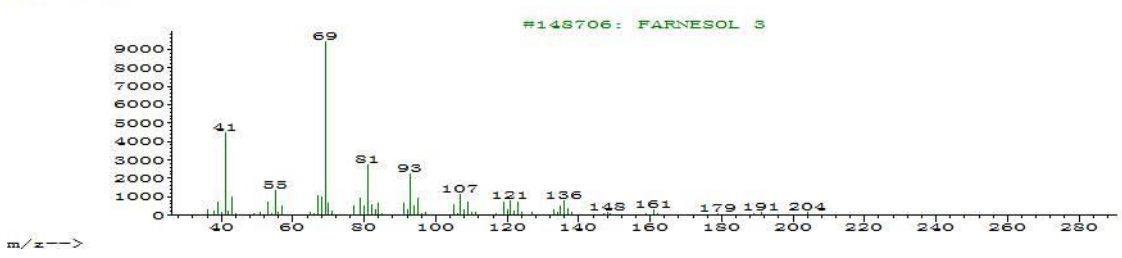

## GC-MS analyses of heat-denatured BvCS as control

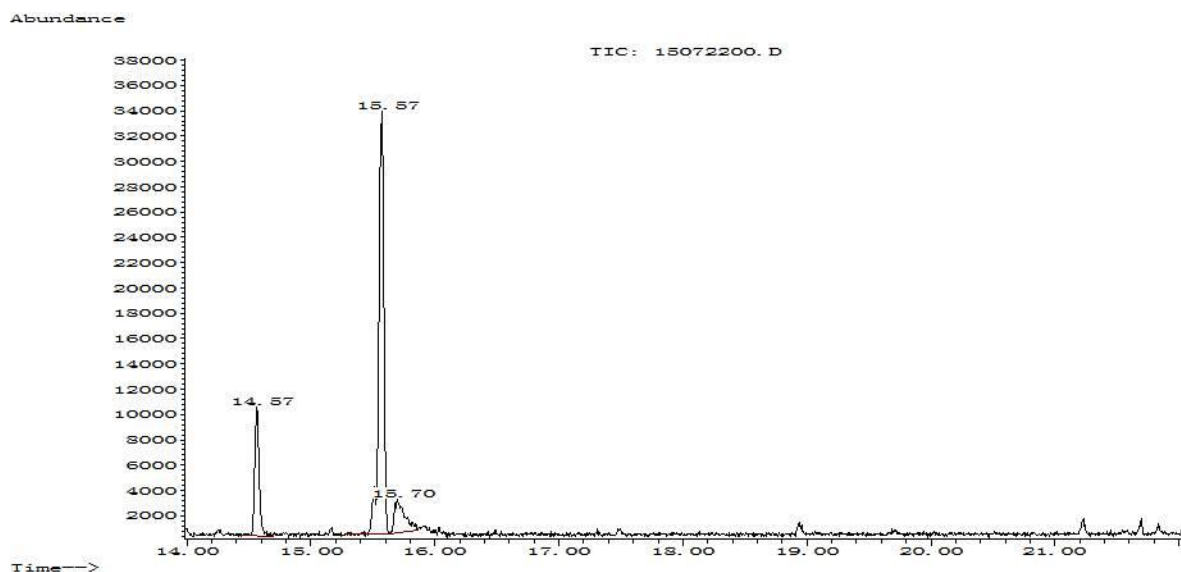

## Mass spectra of the authentic $\delta$ -cadinol (syn. torreyol), $\gamma$ -muurolene and $\alpha$ -muurolene in publications

1. Stefan Garms, Tobias G. Köllner, and Wilhelm Boland. A Multiproduct Terpene Synthase from *Medicago truncatula* Generates Cadalane Sesquiterpenes via Two Different Mechanisms. *J. Org. Chem.* 2010, **75**, 5590–5600.

Mass spectrum of the authentic (–)-torreyol (reference) on Page 27 of the Supporting Information

torreyol (**31**)

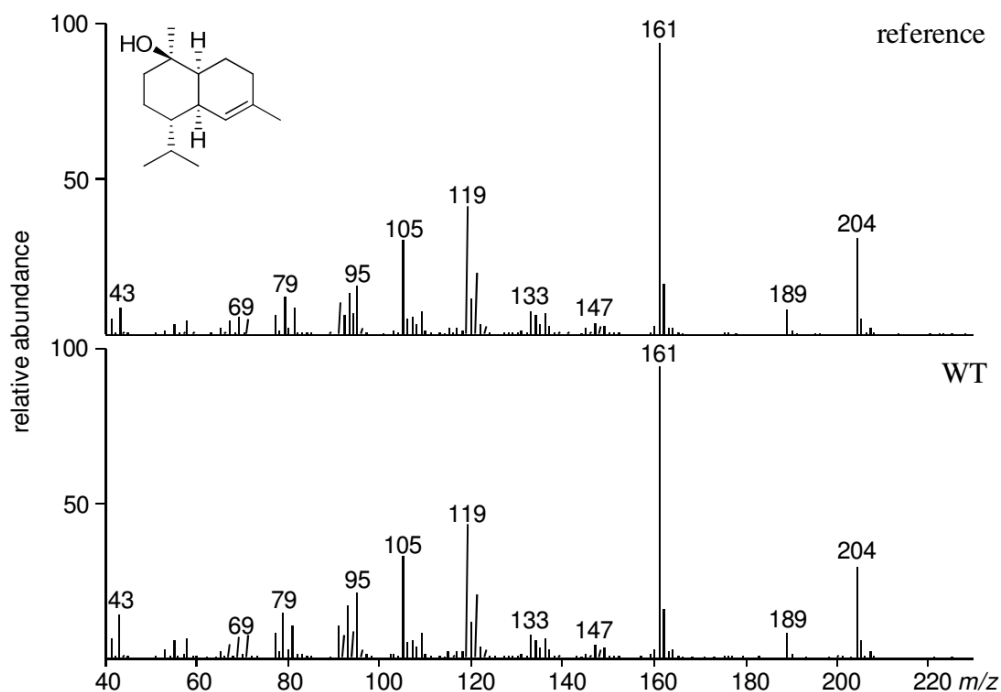

$\gamma$ -muurolene (**16**)

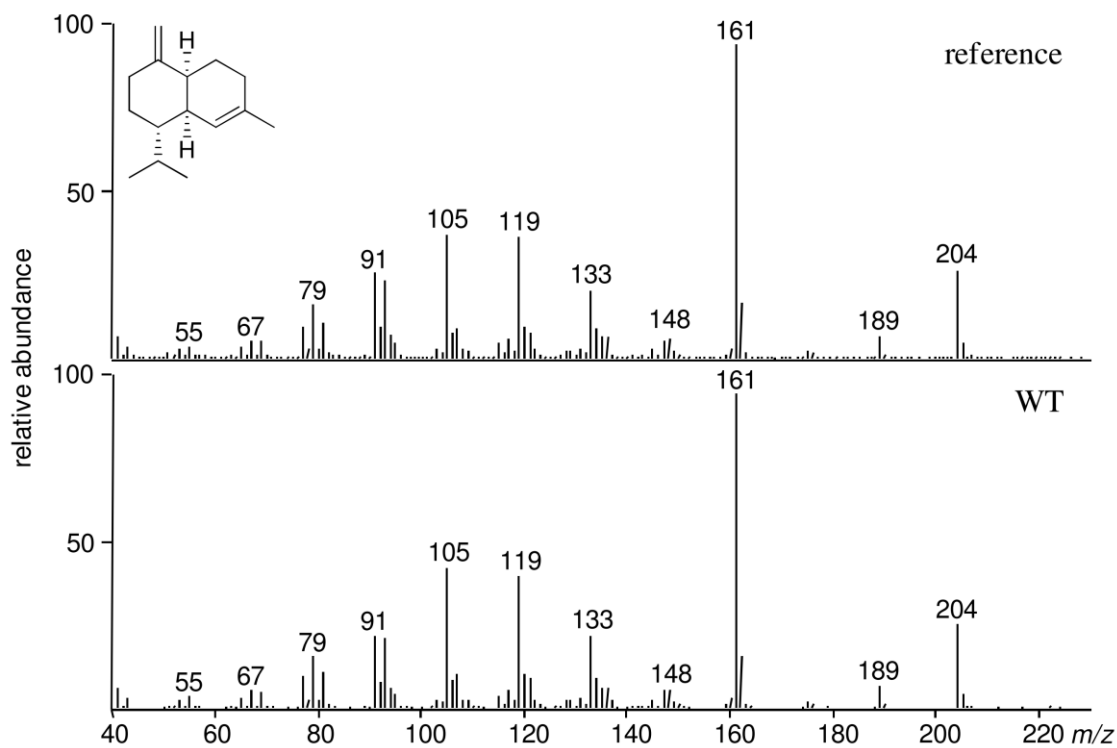

$\alpha$ -muurolene (**19**)

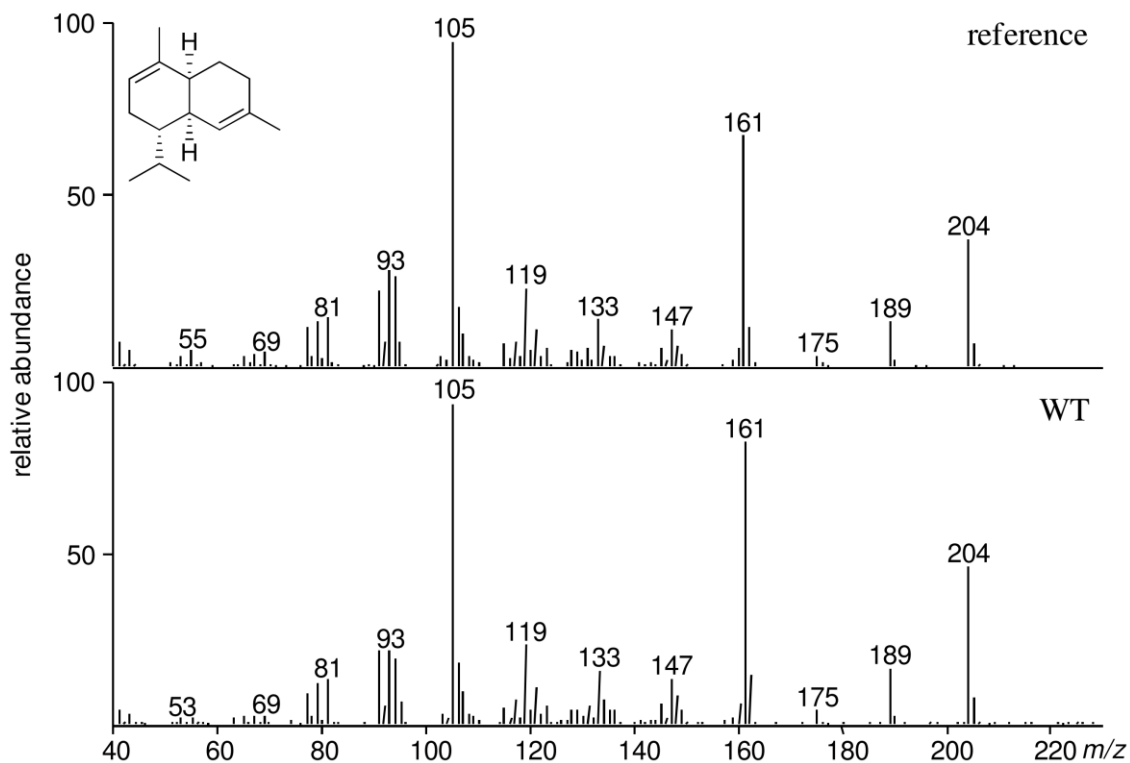

2. A. M. Ainsworth, A. D. M. Rayner, S. J. Broxholme, J. R. Beeching, J. A. Pryke, P. R. Scard, J. Berriman, K. A. Powell, A. J. Floyd, S. K. Branch. Production and properties of the sesquiterpene, (+)-torreyol, in degenerative mycelial interactions between strains of *Stereum*. *Mycol. Res.* 1990, **94** (6), 799–809.



Structural formula of (+)-torreyol.

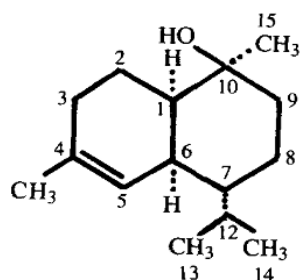

Mass spectrum: m/z (R.I. %) 204 (38), 189 (10), 161 (100), 119 (50), 105 (38), 95 (40)

### Considerations for the germacrene D pathway

1. In the Supporting Information of the paper by P. Rabe & J. S. Dickschat (*Angew. Chem. Int. Ed.* 2013, **52**, 1810–1812), the germacrene D pathway (**Table 2** and **Scheme 2**) was proposed for the enzyme from *Chitinophaga pinensis* DSM 2588 producing both  $\delta$ -cadinene and germacrene D-4-ol, although the putative intermediate germacrene D was not detected in the products. When the enzyme from *Roseiflexus castenholzii* DSM 13941 produced  $\delta$ -cadinene and its similar products, the NPP pathway was proposed (**Table 6** and **Scheme 6**).

**Table 2.** Terpenes identified in headspace extracts of *E. coli* BL21 during heterologous expression of the  $\gamma$ -cadinene synthase from *Chitinophaga pinensis* DSM 2588 (YP\_003124367).

| Compound                                        | $I^{[a]}$ | $I$ (Lit.)          | 1. $I$ % <sup>[b]</sup> | 2. $I$ % <sup>[b]</sup> |
|-------------------------------------------------|-----------|---------------------|-------------------------|-------------------------|
| $\alpha$ -Copaene ( <b>2a</b> )                 | 1376      | 1374 <sup>[1]</sup> | 0.5                     | 0.4                     |
| $\beta$ -Elemene ( <b>2b</b> )                  | 1391      | 1389 <sup>[1]</sup> | 2.5                     | 0.9                     |
| $\gamma$ -Elemene ( <b>2c</b> )                 | 1434      | 1434 <sup>[1]</sup> | 0.3                     | 0.2                     |
| ( <i>E</i> )- $\beta$ -Farnesene ( <b>2d</b> )  | 1454      | 1454 <sup>[1]</sup> | 0.5                     | 0.4                     |
| <i>cis</i> -Muurola-4(15),5-diene ( <b>2e</b> ) | 1464      | 1465 <sup>[1]</sup> | 0.7                     | 0.0                     |
| 10- <i>epi</i> -Zonarene ( <b>2f</b> )          | 1499      | 1501 <sup>[1]</sup> | 1.5                     | 0.0                     |
| $\alpha$ -Muurolene ( <b>2g</b> )               | 1501      | 1500 <sup>[1]</sup> | 3.0                     | 2.1                     |
| $\gamma$ -Cadinene ( <b>2</b> )                 | 1515      | 1513 <sup>[1]</sup> | 84.2                    | 92.6                    |
| $\delta$ -Cadinene ( <b>2h</b> )                | 1525      | 1522 <sup>[1]</sup> | 2.2                     | 2.0                     |
| $\alpha$ -Cadinene ( <b>2i</b> )                | 1539      | 1537 <sup>[1]</sup> | 1.3                     | 1.5                     |
| Germacrene D-4-ol ( <b>2j</b> )                 | 1577      | 1574 <sup>[1]</sup> | 3.3                     | 0.0                     |

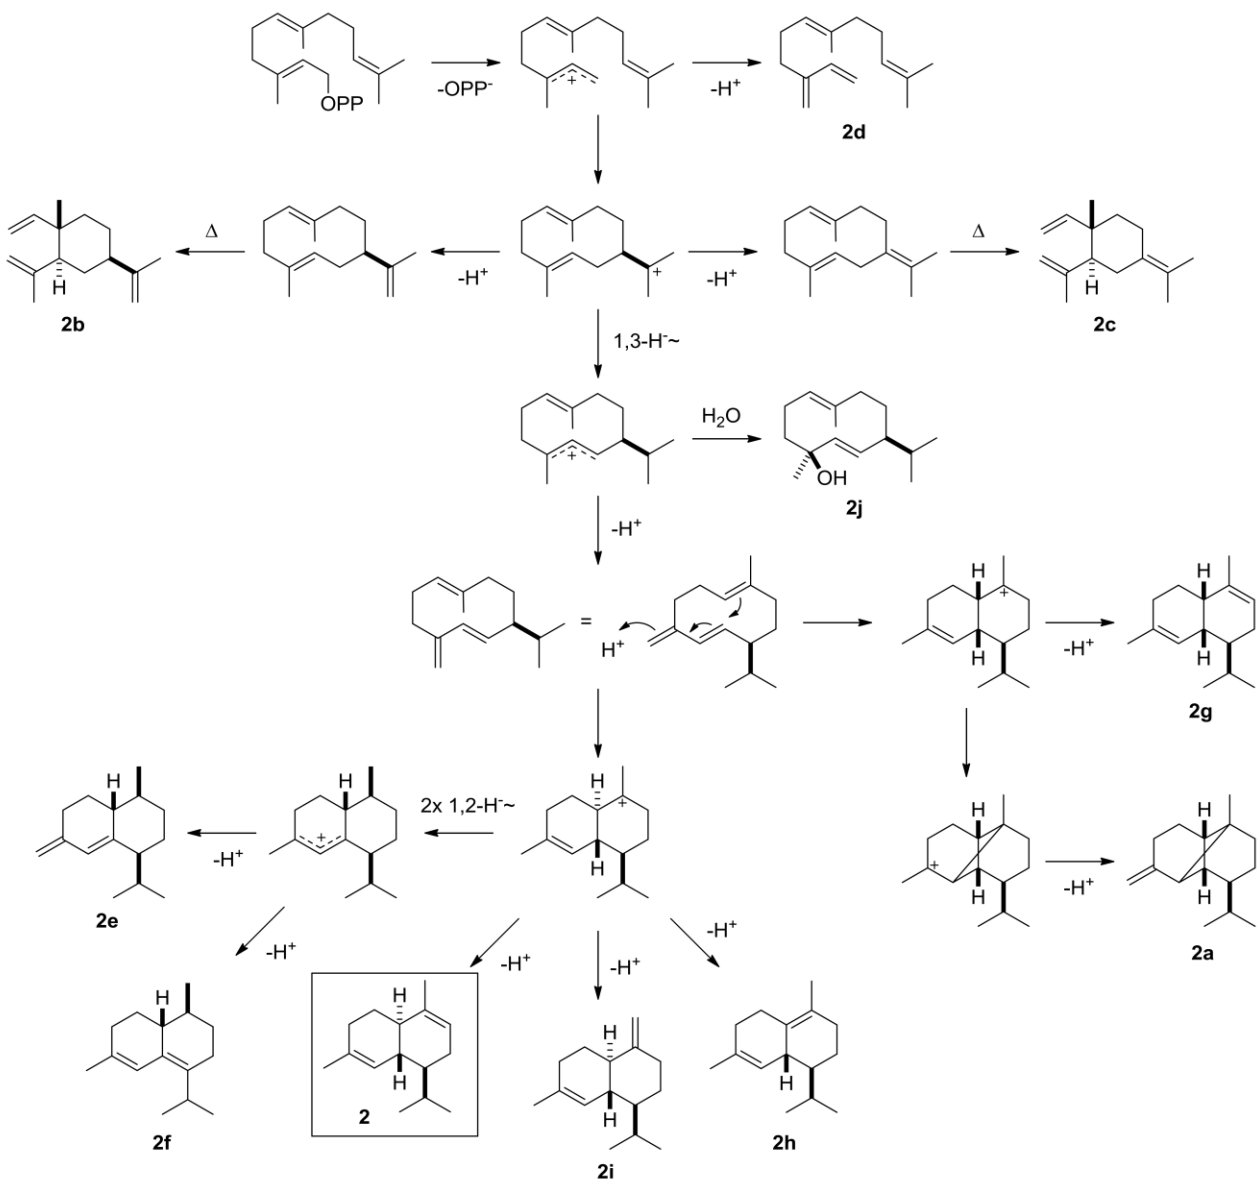

**Scheme 2.** Biosynthetic pathway to the sesquiterpenes produced by the  $\gamma$ -cadinene synthase from *C. pinensis* DSM 2588.

**Table 6.** Terpenes identified in headspace extracts of *E. coli* BL21 during heterologous expression of the T-muurolol synthase from *Roseiflexus castenholzii* DSM 13941 (YP\_001430766).

| Compound                 | $f^{[a]}$ | $I$ (Lit.)          | 1. / % <sup>[b]</sup> | 2. / % <sup>[b]</sup> |
|--------------------------|-----------|---------------------|-----------------------|-----------------------|
| $\gamma$ -Muurolene (6a) | 1478      | 1478 <sup>[1]</sup> | 3.4                   | 10.0                  |
| $\alpha$ -Muurolene (6b) | 1501      | 1500 <sup>[1]</sup> | 5.0                   | 14.7                  |
| $\delta$ -Cadinene (6c)  | 1523      | 1522 <sup>[1]</sup> | 1.9                   | 15.6                  |
| T-Muurolol (6)           | 1640      | 1640 <sup>[1]</sup> | 89.7                  | 59.6                  |

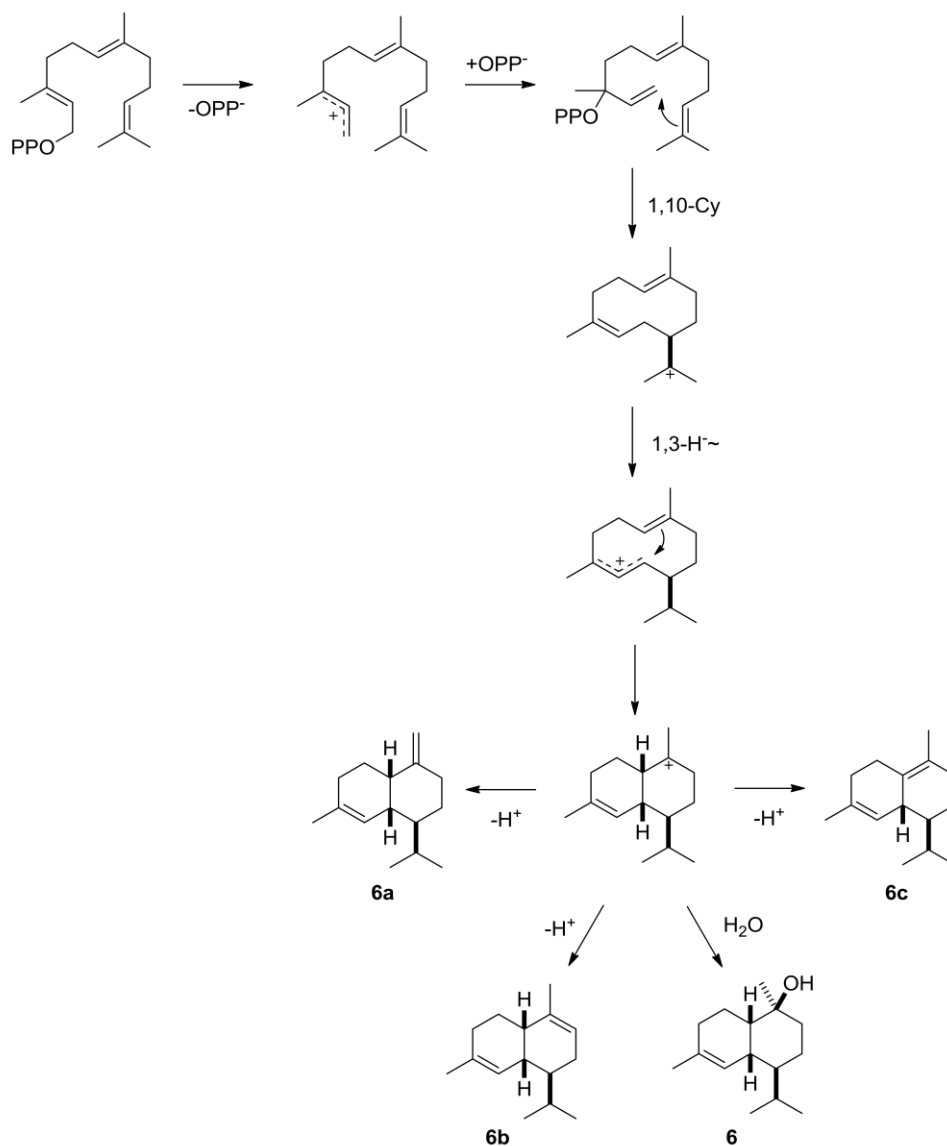

**Scheme 6.** Biosynthetic pathway to the sesquiterpenes produced by the T-muurolool synthase from *R. castenholzii* DSM 13941.

2. Garms et al (*J. Org. Chem.* 2010, **75**, 5590–5600) demonstrated that MtTPS5 can give torreyol (also  $\delta$ -cadinol) as its minor product. Based on the labeling experiments conducted with deuterium oxide, cadalane sesquiterpenes are mainly (92%) produced via the protonation of the neutral intermediate germacrene D (highlighted blue in Scheme 6), and about 8% arises from NPP pathway (highlighted orange in Scheme 6).
